# Supplementary material for: Biocompatible glycolipid derived from bhilawanol as an antibiofilm agent and a promising platform for drug delivery
Source: Royal Society of Chemistry journal article supplement (doi:10.1039/d4md00828f), 2025-01-01
Supplement: d4md00828f1.pdf [file d4md00828f1.pdf]

## SUPPORTING INFORMATION

### **Biocompatible Glycolipid derived from Bhilawanol as an Antibiofilm Agent and Promising Platform for Drug Delivery**

Tohira Banoo,<sup>[a]</sup> Abhijit Ghosh,<sup>[b]</sup> Priyasha Mishra,<sup>[b]</sup> Sanhita Roy,<sup>[b]</sup> and Subbiah Nagarajan\*<sup>[a]</sup>

[a] Assembled organic and Hybrid Material Lab, Department of Chemistry,  
National Institute of Technology Warangal, Hanumakonda-506004, Telangana, India  
E-mail: snagarajan@nitw.ac.in; snrajannpt@yahoo.co.in

[b] Dr. Chigurupati Nageswara Rao Ocular Pharmacology Research Centre, LV Prasad Eye Institute  
Hyderabad – 500034, Telangana, India

#### Table of content.

|                                                                            |         |
|----------------------------------------------------------------------------|---------|
| 1. Table S1. Gelation studies of compounds 4a and 4b.                      | S2      |
| 2. <sup>1</sup> H and <sup>13</sup> C NMR and HRMS spectra                 | S3-S18  |
| 3. Optical microscopic images of the gel 4b in (DMSO+ H <sub>2</sub> O).   | S19     |
| 4. Effect of gel strength with respect to concentration                    | S19     |
| 5. pH as stimuli-responsive curcumin release studies using UV-vis          | S20     |
| 6. Antimicrobial studies of compound 4b against various bacterial strains. | S21-S22 |

Table S1: Gelation studies of compounds 4a and 4b.

| S.No | Solvent              | Compound 4a (CGC % wt/v) | Compound 4b (CGC % wt/v) |
|------|----------------------|--------------------------|--------------------------|
| 1    | Chloroform           | I                        | I                        |
| 2    | DMSO                 | S                        | S                        |
| 3    | Water                | PS                       | PS                       |
| 4    | Toluene              | I                        | I                        |
| 5    | Olive oil            | S                        | S                        |
| 6    | Linseed oil          | S                        | S                        |
| 7    | Xylene               | I                        | PS                       |
| 8    | Cyclohexane          | I                        | I                        |
| 9    | DMSO+Water           | G (1.5)                  | G (1.0)                  |
| 10   | DMSO+Chloroform      | G (2.0)                  | G (1.0)                  |
| 11   | N methyl pyrrolidine | I                        | I                        |
| 12   | Paraffin             | I                        | I                        |
| 13   | THF                  | I                        | I                        |
| 14   | Acetone              | S                        | S                        |
| 15   | PEG                  | PG                       | PG                       |
| 16   | 1,4 Dioxane          | PS                       | S                        |
| 17   | Ethylene glycol      | S                        | S                        |

*I-insoluble; S-solution, G-gelation, PS – partially soluble, PG-partial gel*

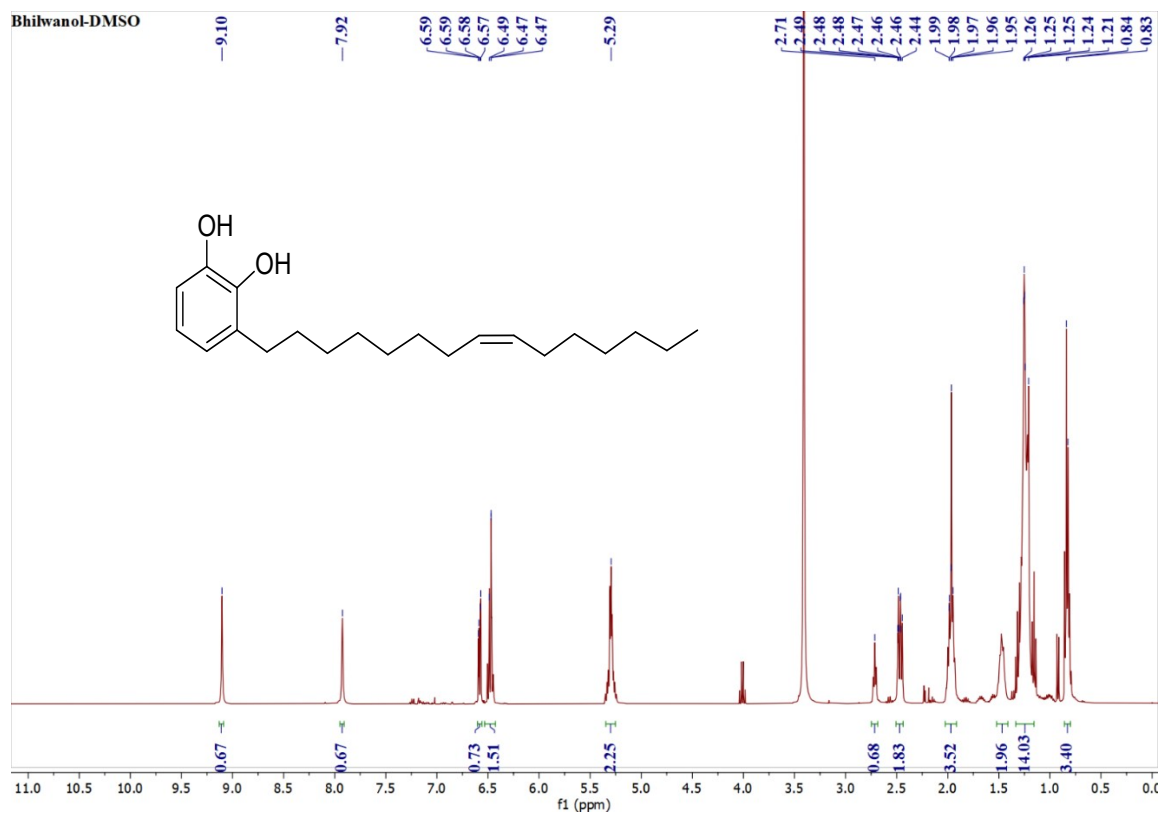

Figure S1.  $^1\text{H}$  NMR spectra of compound 1a (DMSO- $\text{d}_6$ , 400MHz)

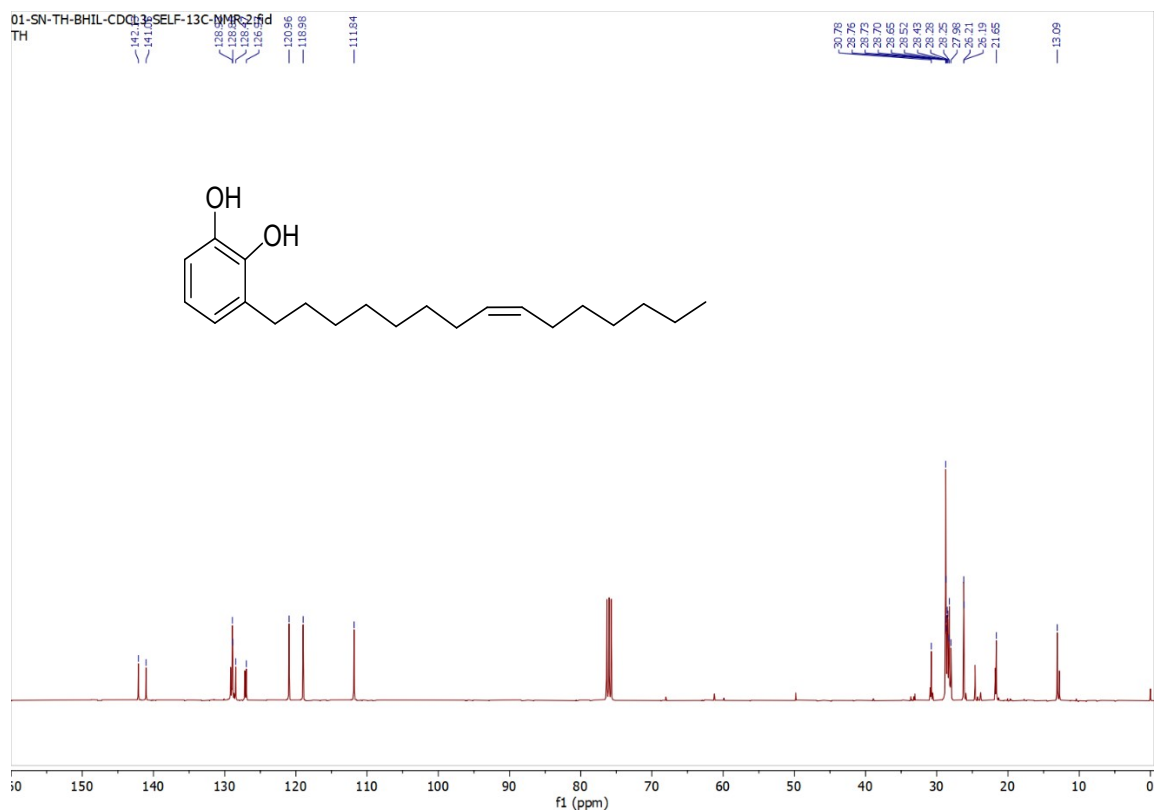

Figure S2.  $^{13}\text{C}$  NMR spectra of compound 3a ( $\text{CDCl}_3$ , 100MHz)

|                    |             |                               |         |                        |                       |
|--------------------|-------------|-------------------------------|---------|------------------------|-----------------------|
| <b>Sample Name</b> | bhil        | <b>Position</b>               | P1-A7   | <b>Instrument Name</b> | Instrument 1          |
| <b>User Name</b>   |             | <b>Inj Vol</b>                | 2       | <b>InjPosition</b>     |                       |
| <b>Sample Type</b> | Sample      | <b>IRM Calibration Status</b> | Success | <b>Data Filename</b>   | 18.7.2023-7.d         |
| <b>ACQ Method</b>  | HRMS-NITW.m | <b>Comment</b>                |         | <b>Acquired Time</b>   | 18-Jul-23 12:16:07 PM |

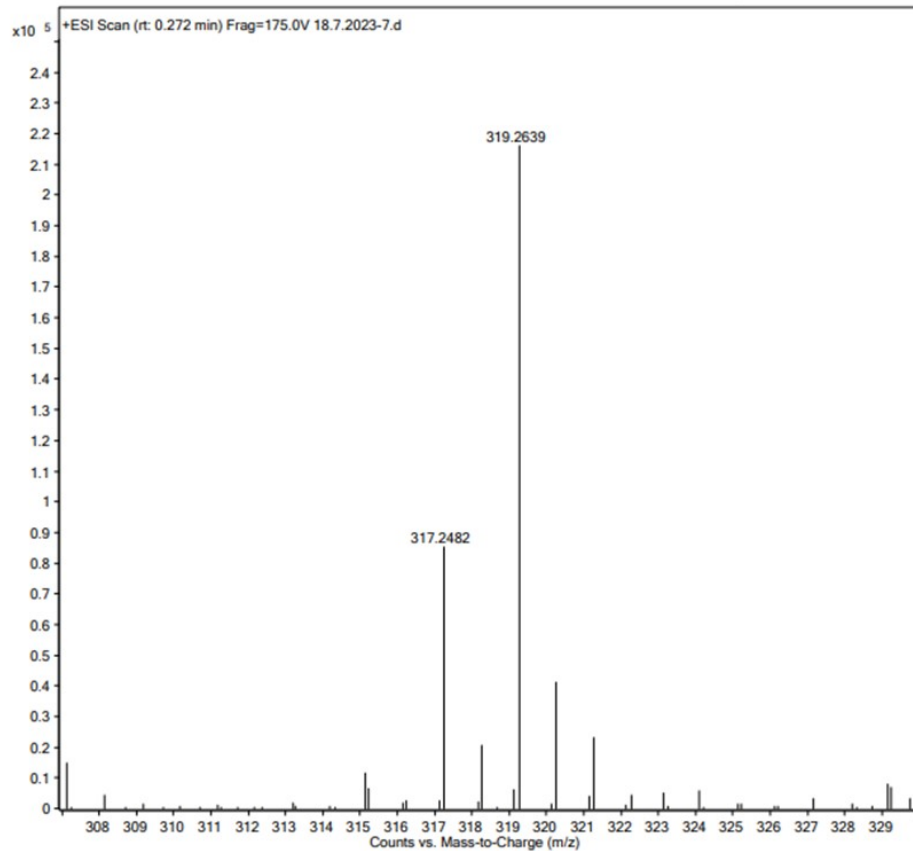

Figure S3. HRMS spectra of compound 1a.

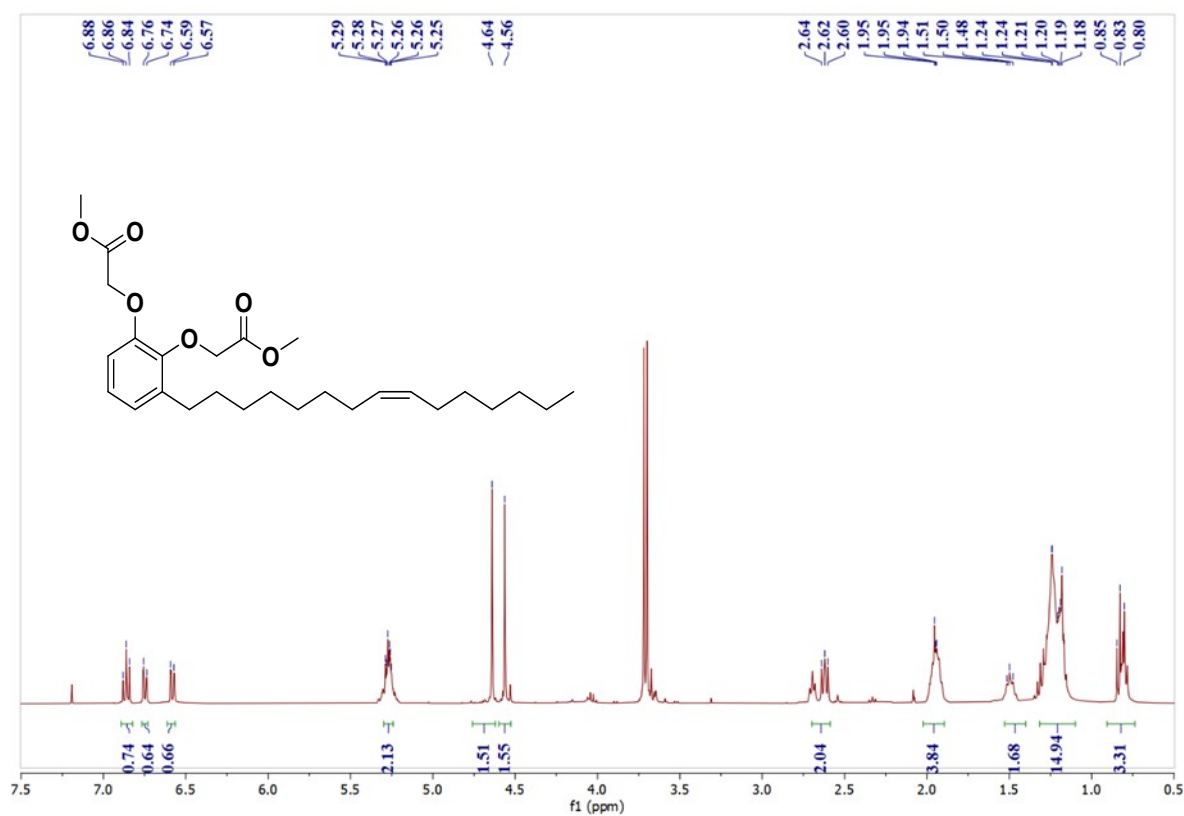

Figure S4. <sup>1</sup>H NMR spectra of compound 2a (DMSO-d<sub>6</sub>, 400MHz)

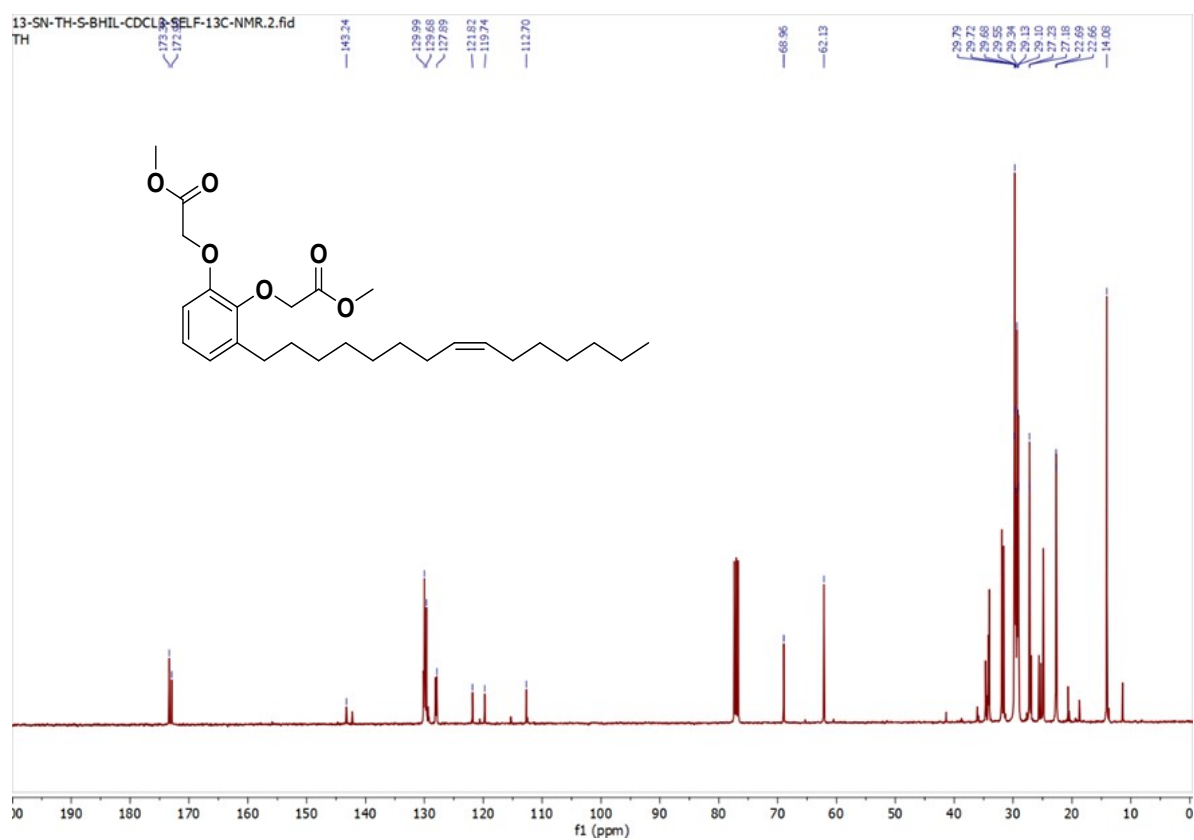

Figure S5. <sup>13</sup>C NMR spectra of compound 2a (CDCl<sub>3</sub>, 100MHz)

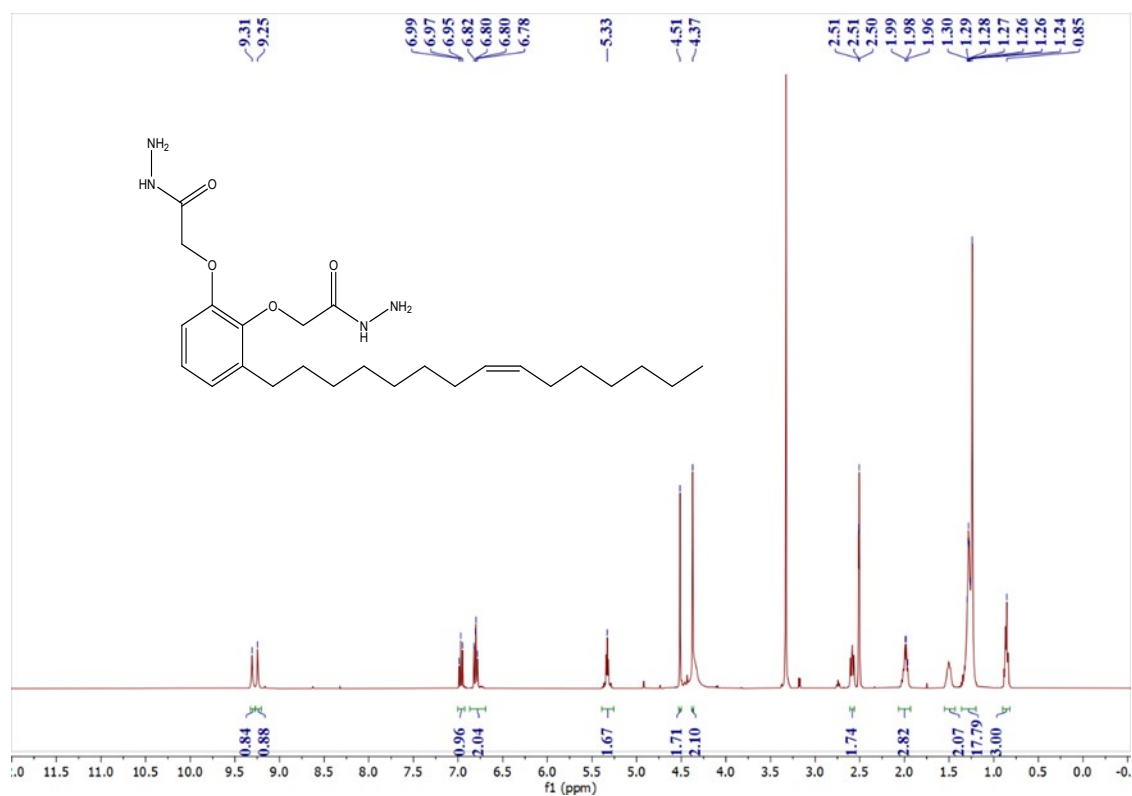

Figure S6. <sup>1</sup>H NMR spectra of compound 3a (DMSO-d<sub>6</sub>, 400MHz)

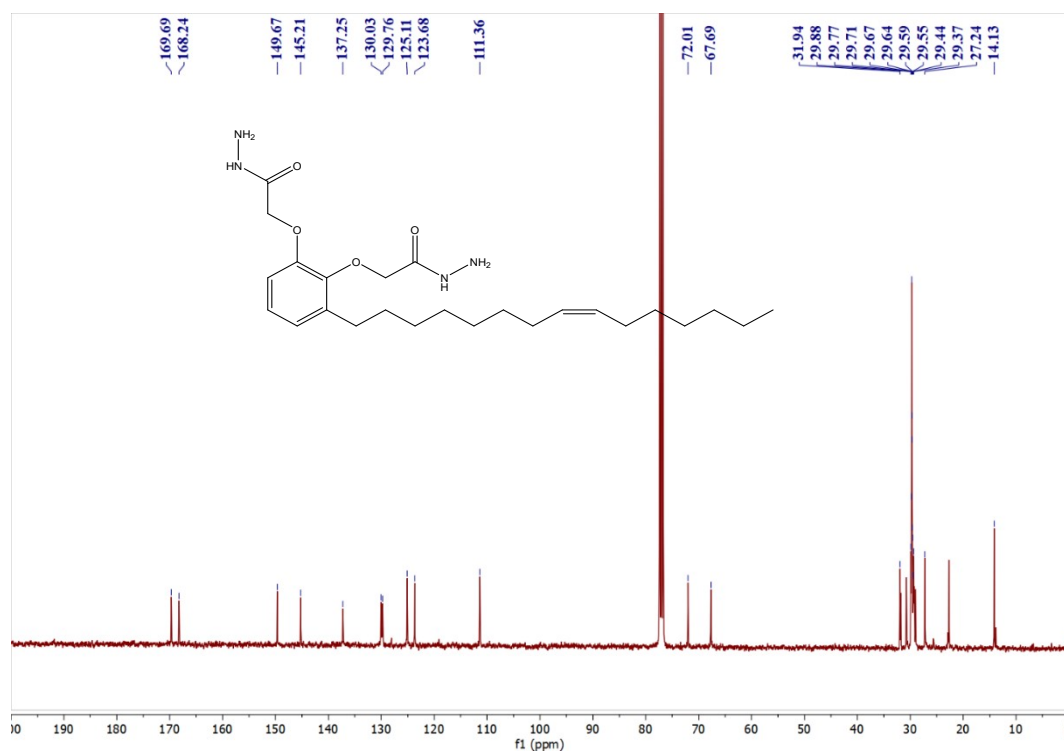

Figure S7. <sup>13</sup>C NMR spectra of compound 3a (CDCl<sub>3</sub>, 100MHz)

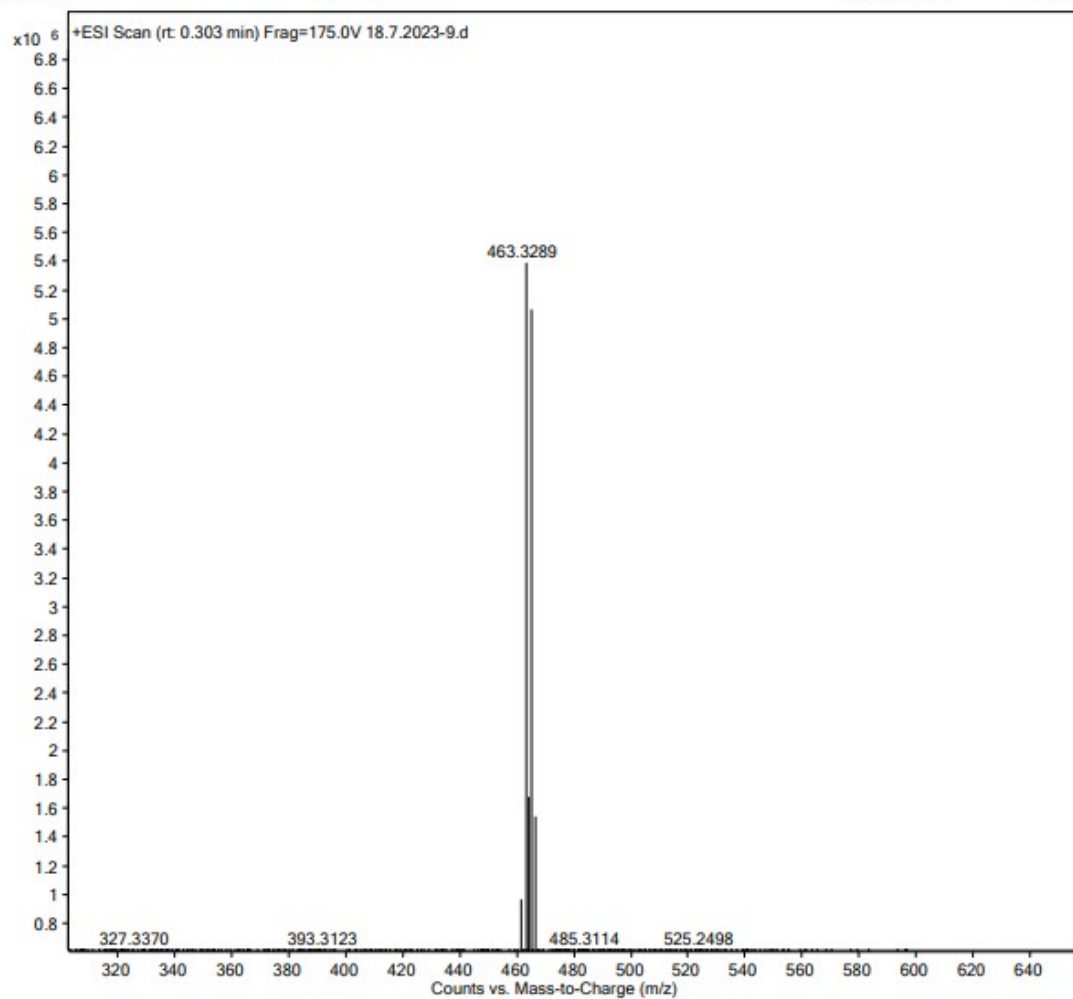

Figure S8. HRMS spectra of compound 3a

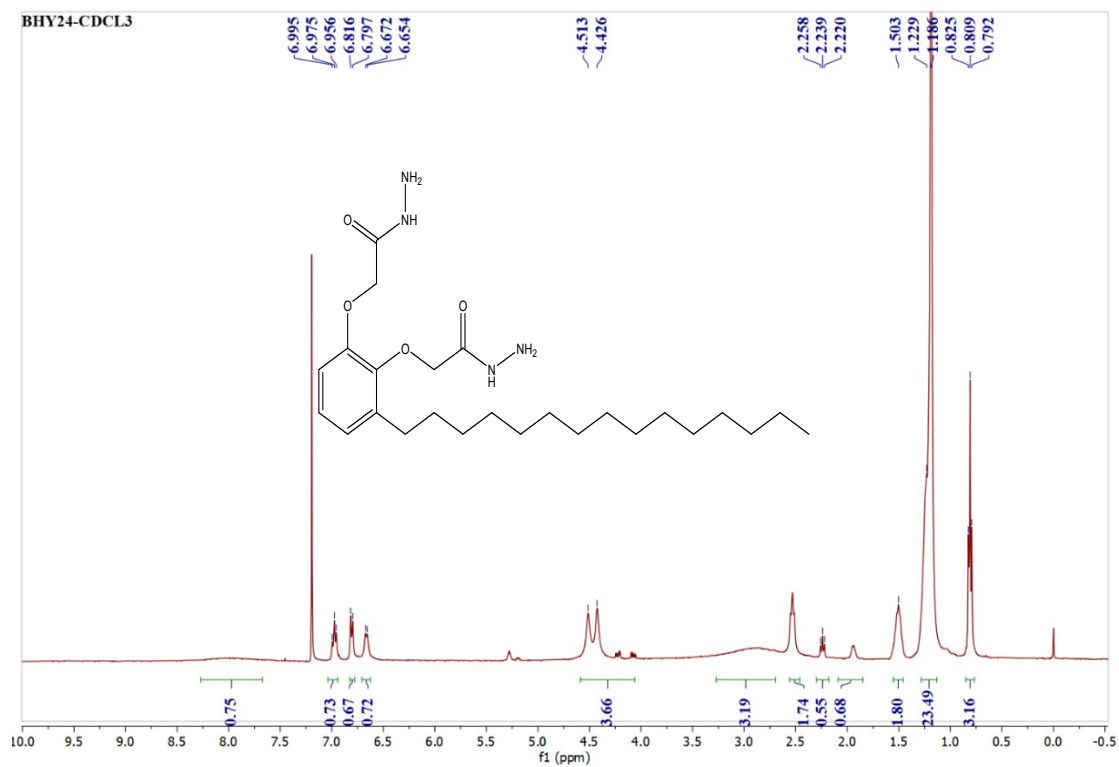

Figure S9. <sup>1</sup>H NMR spectra of compound 3b (CDCl<sub>3</sub>, 400MHz)

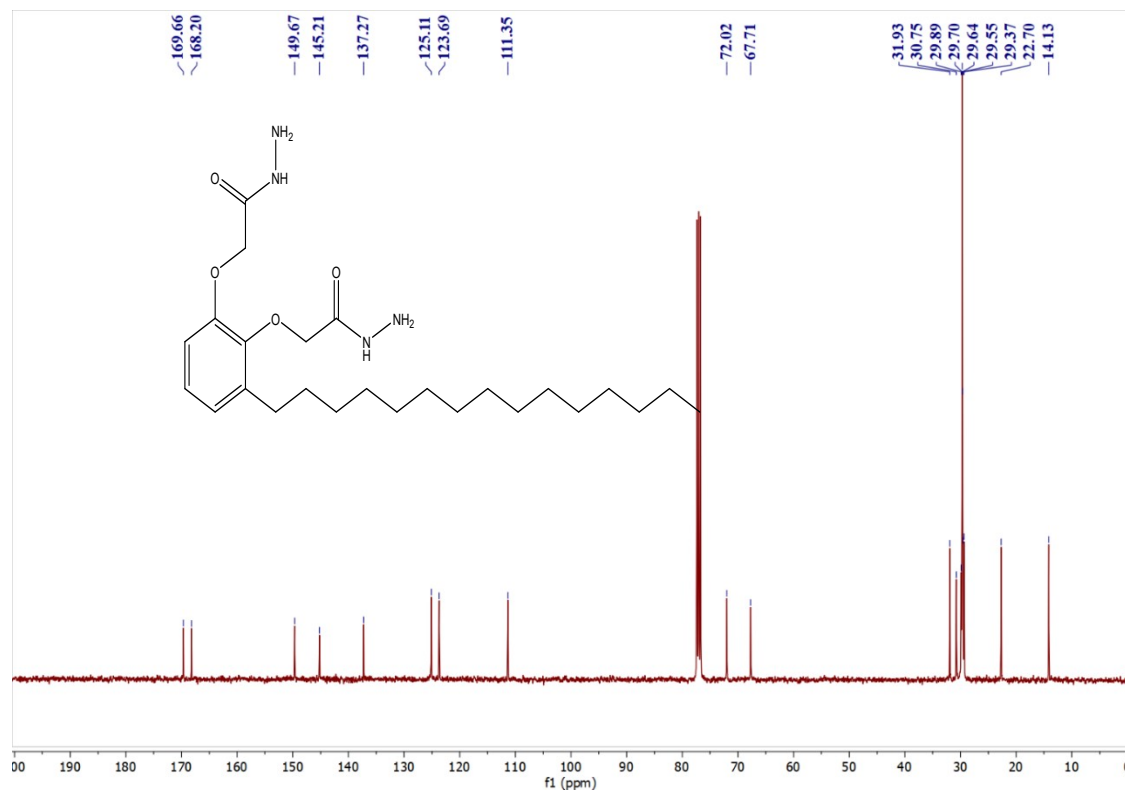

Figure S10. <sup>13</sup>C NMR spectra of compound 3b (CDCl<sub>3</sub>, 100MHz)



|             |             |                        |         |                 |                       |
|-------------|-------------|------------------------|---------|-----------------|-----------------------|
| Sample Name | bhil-hz-s   | Position               | P1-A8   | Instrument Name | Instrument 1          |
| User Name   |             | Inj Vol                | 2       | InjPosition     |                       |
| Sample Type | Sample      | IRM Calibration Status | Success | Data Filename   | 18.7.2023-8.d         |
| ACQ Method  | HRMS-NITW.m | Comment                |         | Acquired Time   | 18-Jul-23 12:20:05 PM |

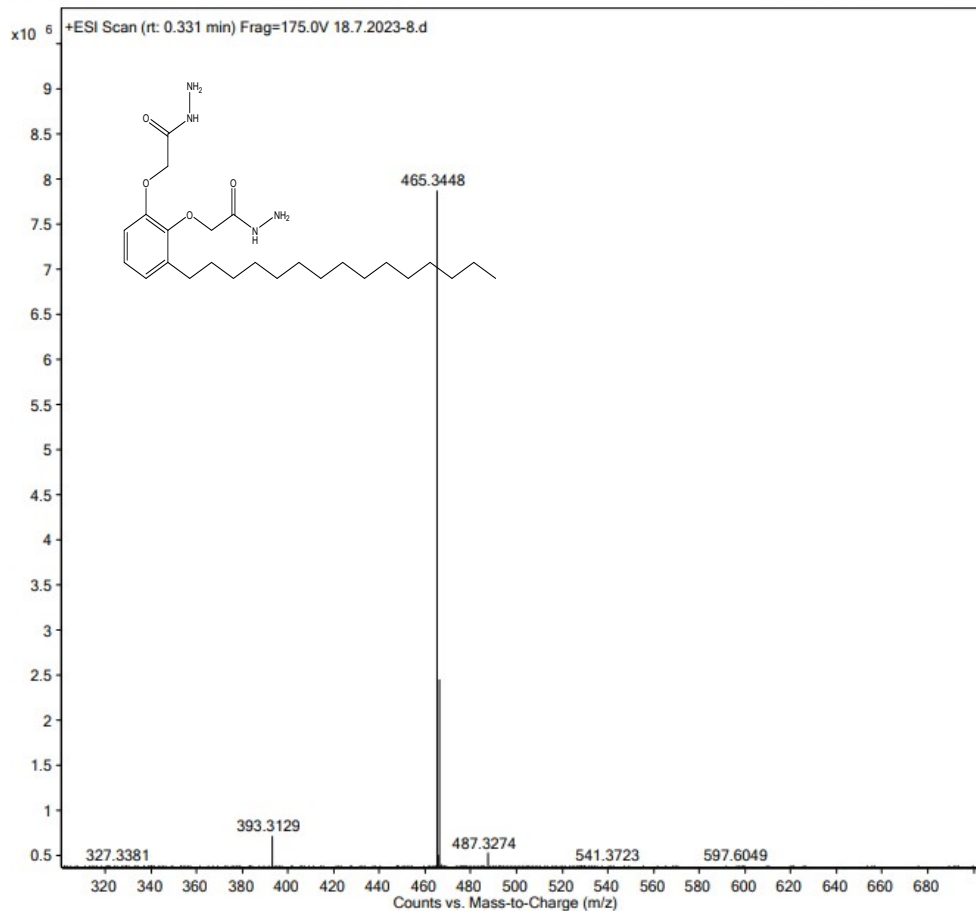

Figure S11. HRMS spectra of compound 3b

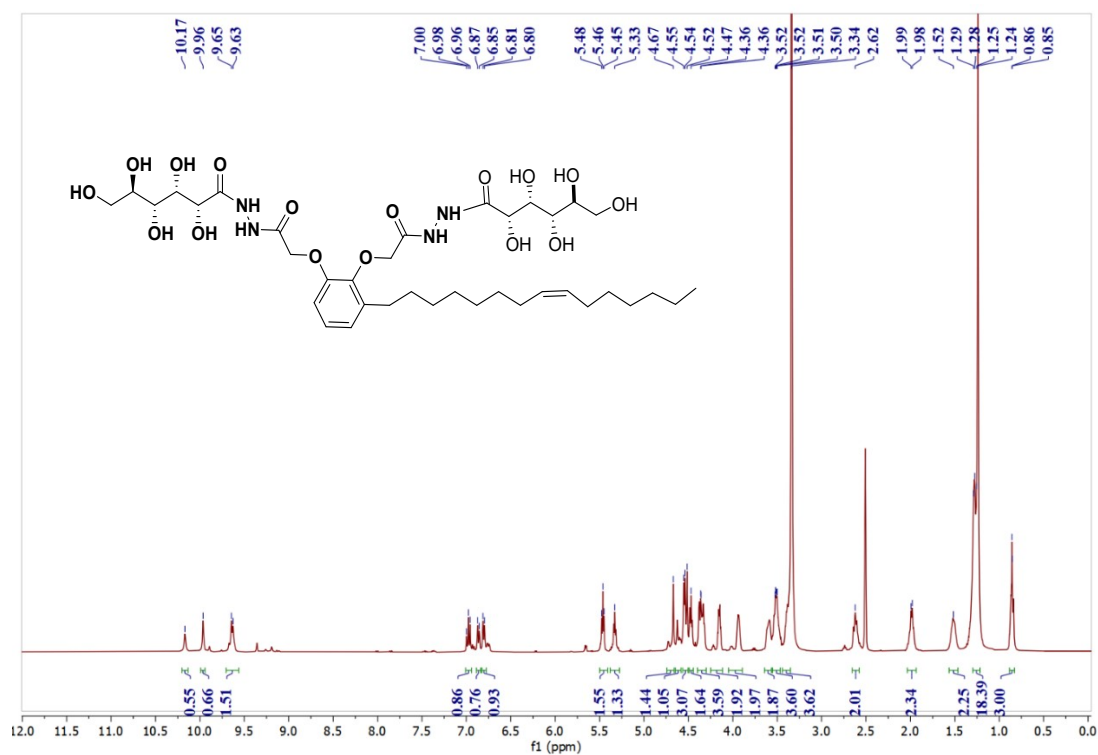

Figure S12. <sup>1</sup>H NMR spectra of compound 4a (DMSO-d<sub>6</sub>, 400MHz)

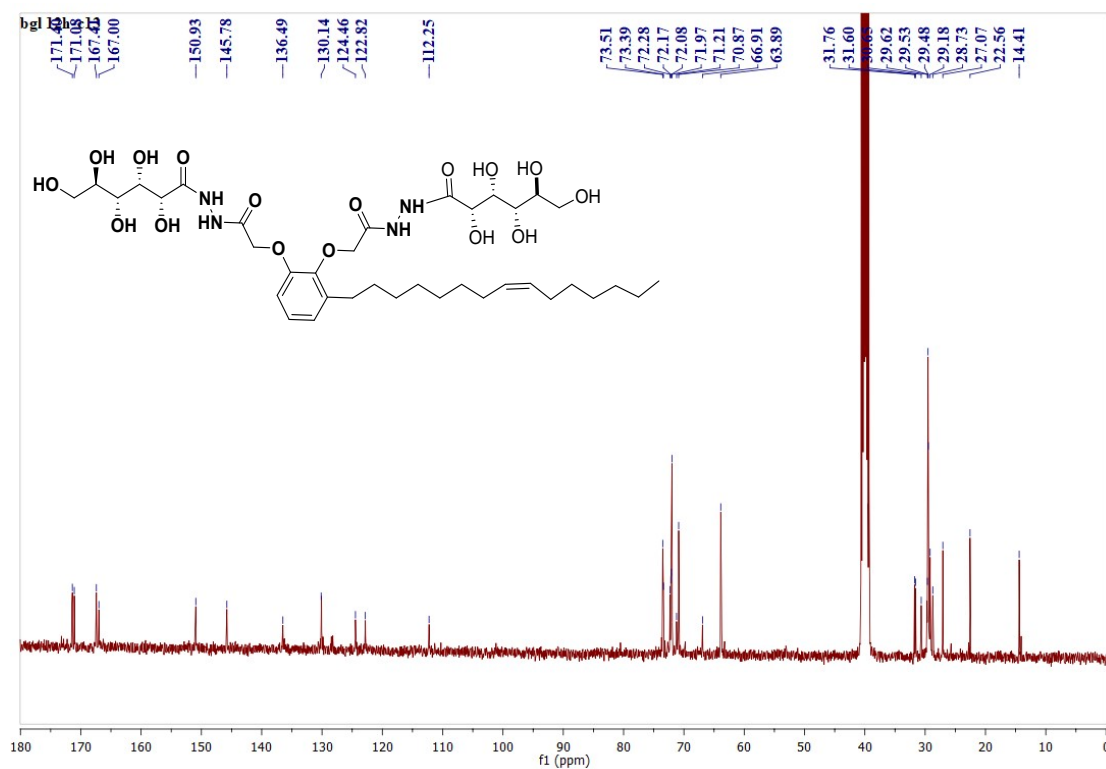

Figure S13. <sup>13</sup>C NMR spectra of compound 4a (DMSO-d<sub>6</sub>, 100MHz)

|                    |          |                               |         |                        |                      |
|--------------------|----------|-------------------------------|---------|------------------------|----------------------|
| <b>Sample Name</b> | B-G2-12  | <b>Position</b>               | P1-A5   | <b>Instrument Name</b> | Instrument 1         |
| <b>User Name</b>   |          | <b>Inj Vol</b>                | 2       | <b>InjPosition</b>     |                      |
| <b>Sample Type</b> | Sample   | <b>IRM Calibration Status</b> | Success | <b>Data Filename</b>   | 28.03.2022-5.d       |
| <b>ACQ Method</b>  | NITW-W.m | <b>Comment</b>                |         | <b>Acquired Time</b>   | 28-Mar-22 1:25:33 PM |

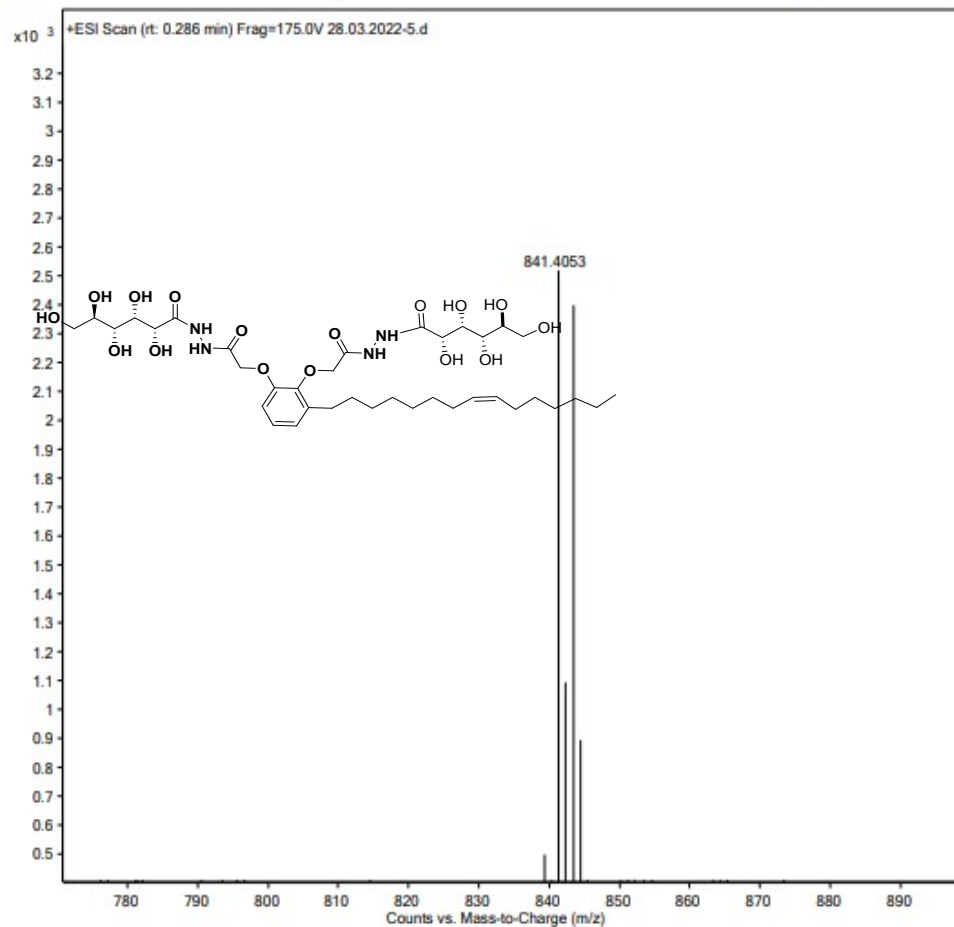

Figure S14. HRMS spectra of compound 4a

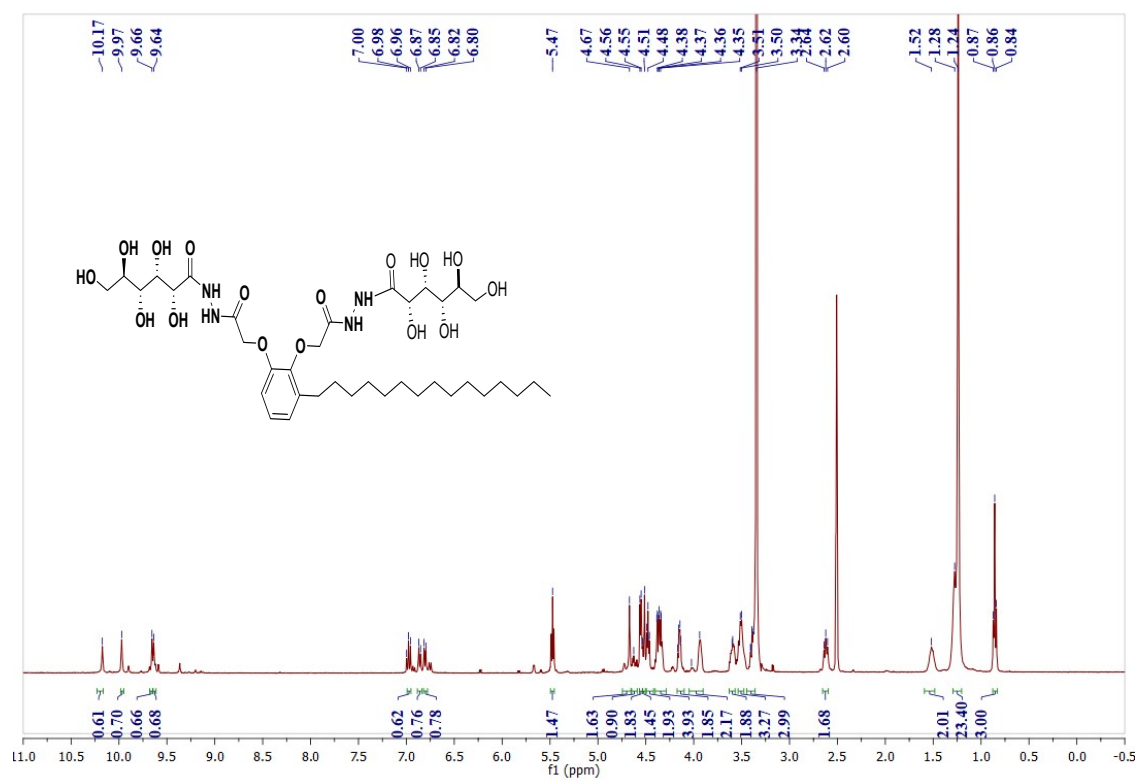

Figure S15.  $^1\text{H}$  NMR spectra of compound 4b (DMSO- $\text{d}_6$ , 400MHz)

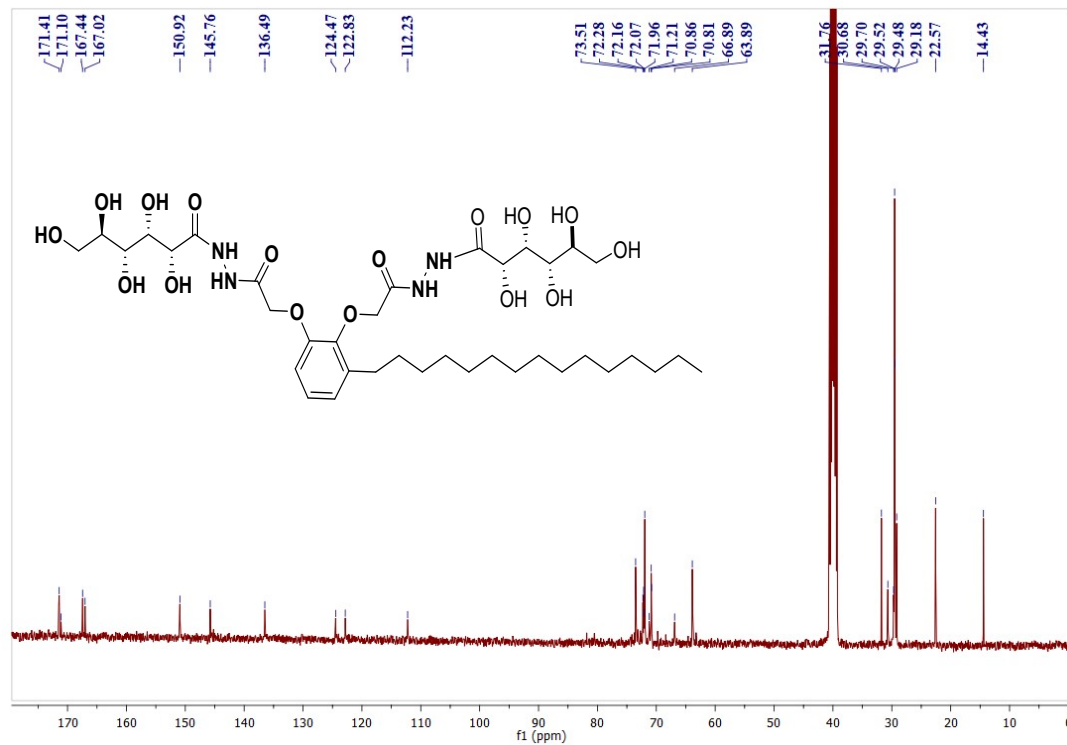

Figure S16.  $^{13}\text{C}$  NMR spectra of compound 4b (DMSO- $\text{d}_6$  100MHz)

|             |          |                        |         |                 |                      |
|-------------|----------|------------------------|---------|-----------------|----------------------|
| Sample Name | B-GL2    | Position               | P1-C2   | Instrument Name | Instrument 1         |
| User Name   |          | Inj Vol                | 2       | InjPosition     |                      |
| Sample Type | Sample   | IRM Calibration Status | Success | Data Filename   | 02.02.2022-20.d      |
| ACQ Method  | NITW-W.m | Comment                |         | Acquired Time   | 02-Feb-22 4:22:26 PM |

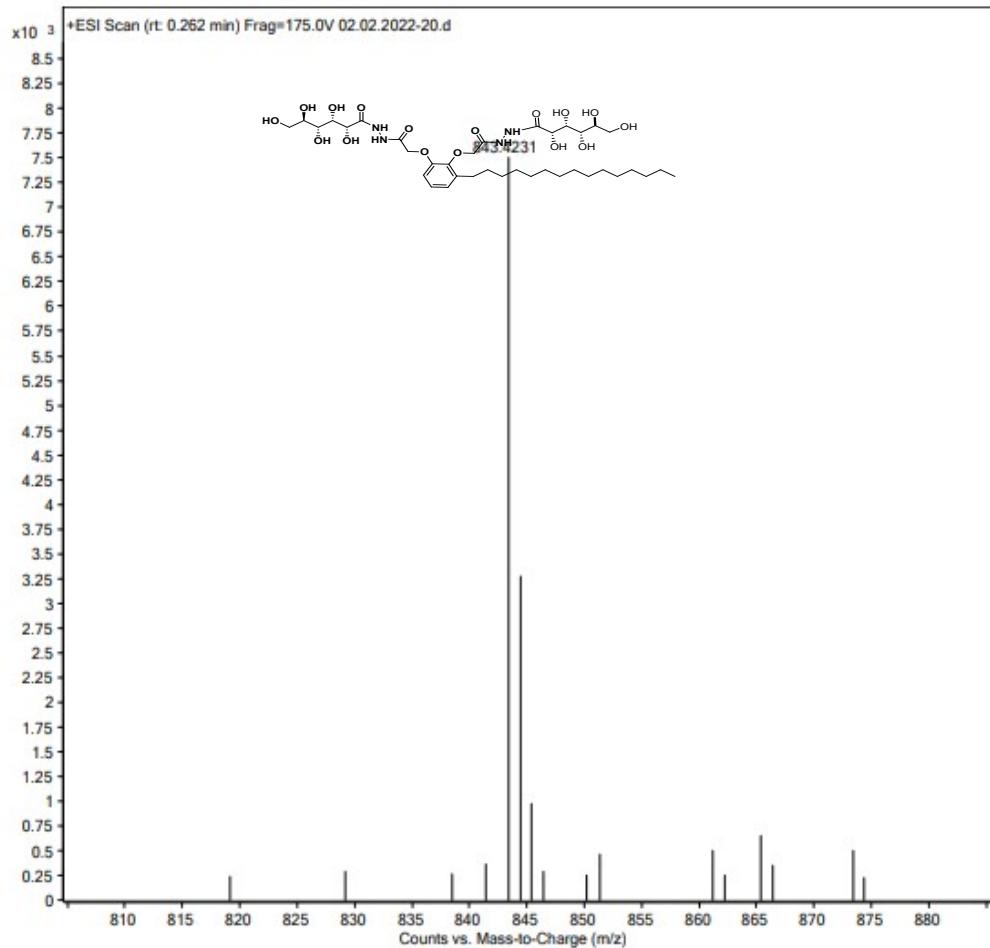

Figure S17. HRMS spectra of compound 4b

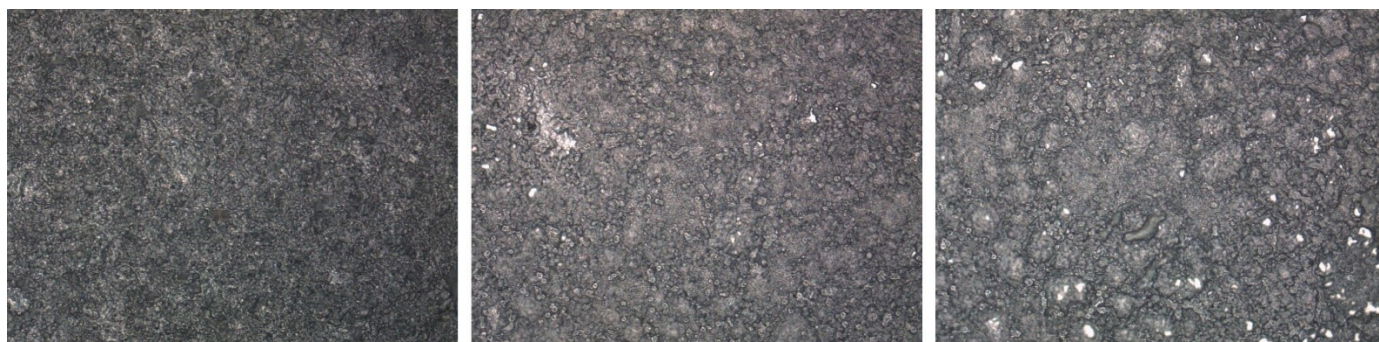

Figure S18. Optical microscopic images of the compound 4b in DMSO+ Water.

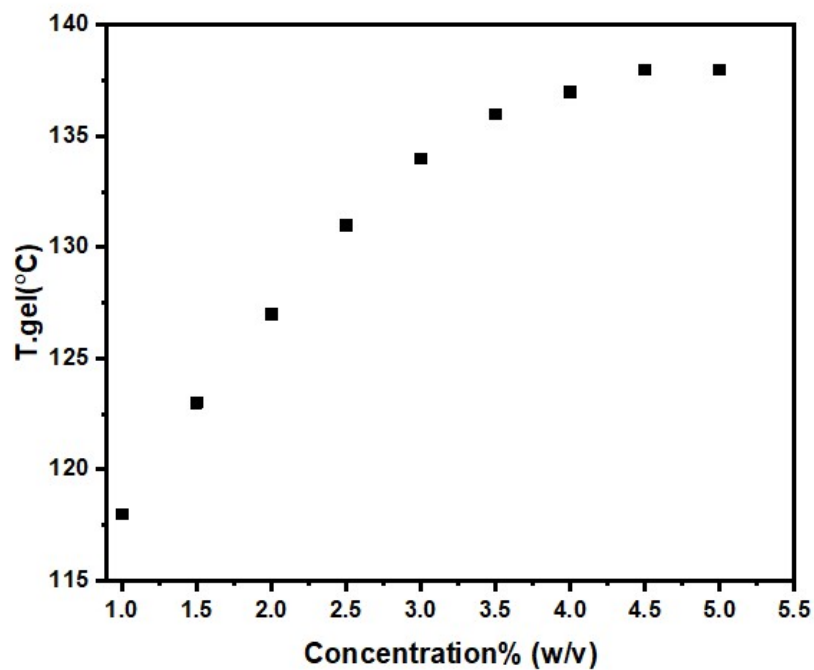

Figure S19. Thermal stability of hydrogel formed by compound 4b with respect to concentration.

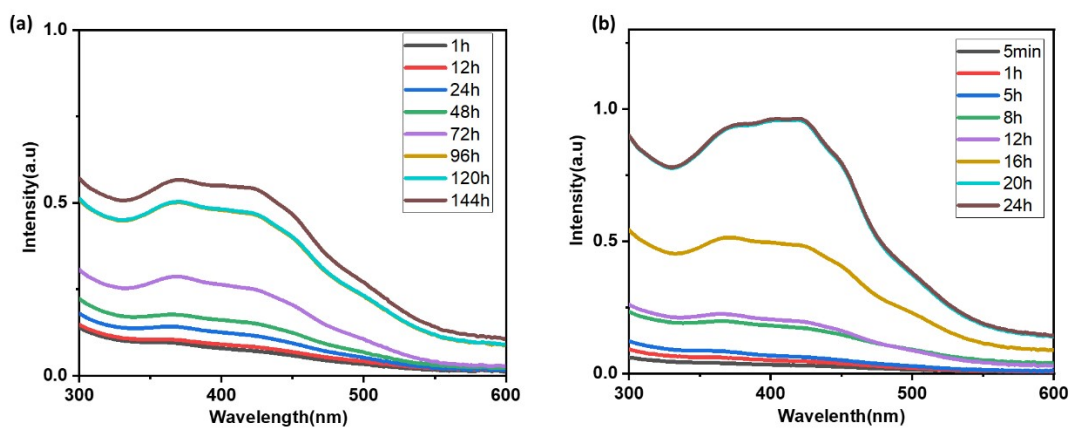

Figure S20. UV-vis studies demonstrating the curcumin release from hydrogel matrix at different time intervals under pH as stimuli responsive condition (a) acidic pH (b) neutral pH.

Cytotoxic study, antimicrobial studies of compound 4b against various bacterial strains.

1.*Pseudomonas aeruginosa*.

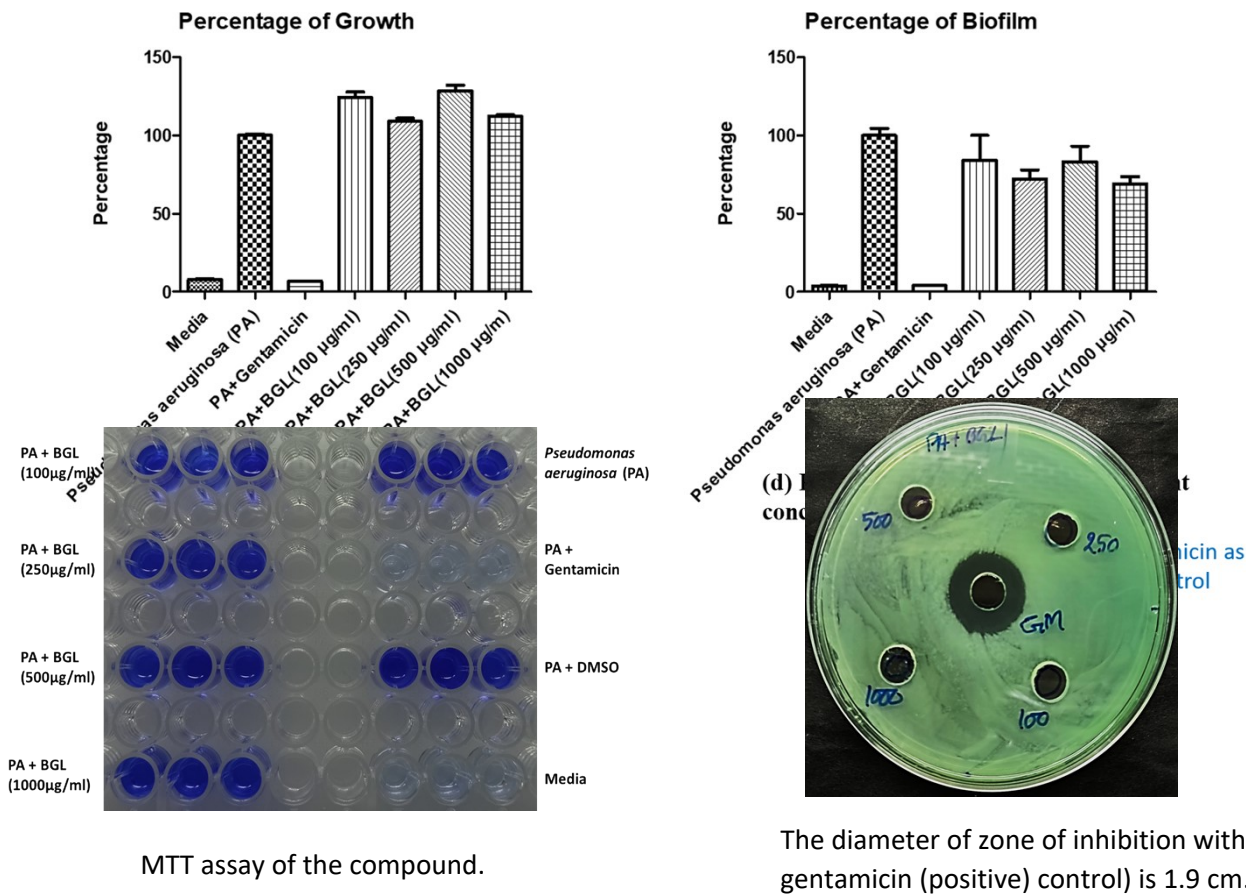

Figure S21. Anti-bacterial and anti- biofilm study against *Pseudomonas aeruginosa*



2.*Escherichia coli* (E. coli)

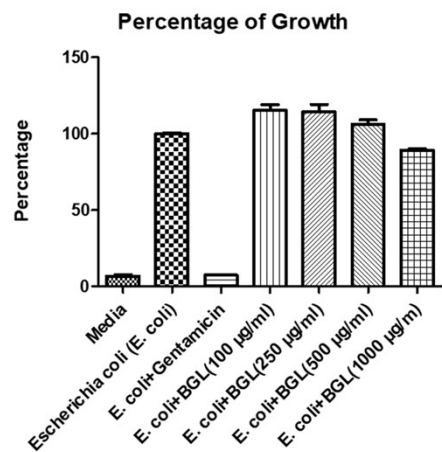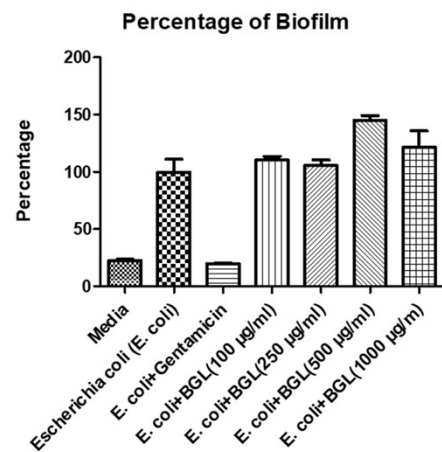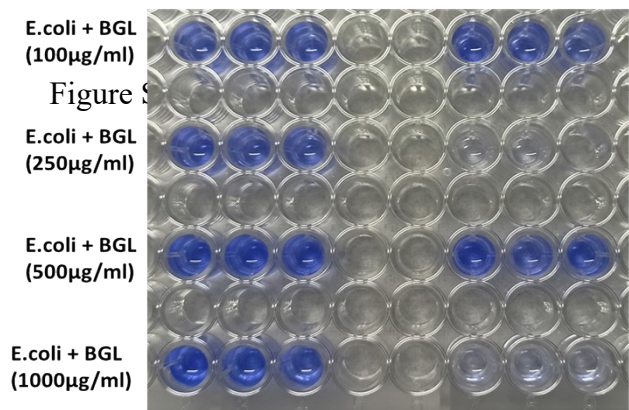

MTT assay of the compound

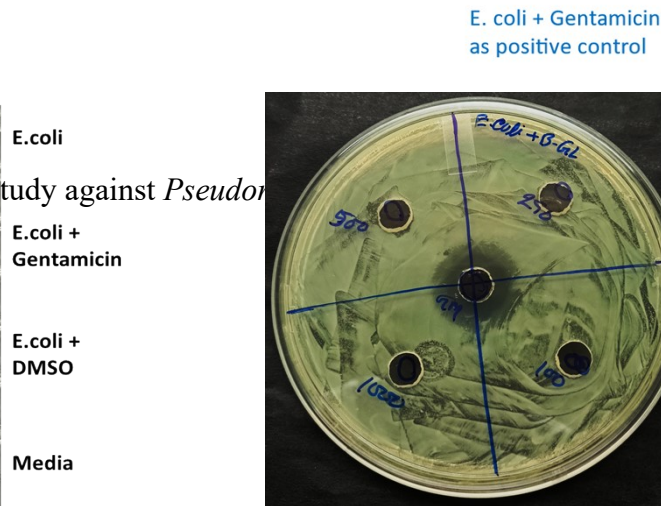

The diameter of zone of inhibition with gentamicin (positive control) is 2cm.

Figure S22. Anti-bacterial and anti- biofilm study against *Escherichia coli* (E. coli)
